# Supplementary material for: A solid-state lithium metal battery with extended cycling and rate performance using a low-melting alloy interface
Source: Royal Society of Chemistry journal article supplement (doi:10.1039/d2qi02127g), 2022-12-23
Supplement: d2qi02127g1.pdf [file d2qi02127g1.pdf]

Electronic Supplementary Information

**Solid-state lithium metal battery with extended cycling and rate performance by a low-melting alloy interface**

Tingting Luo<sup>a</sup>, Ling Wang<sup>a</sup>, Lei Dai<sup>a</sup>, Jiayan Luo<sup>b</sup>, Shan Liu<sup>\*a</sup>

<sup>a</sup>School of Chemical Engineering, North China University of Science and Technology, Tangshan, 063009, China. E-mail: sliu@ncst.edu.cn

<sup>b</sup>Shanghai Key Laboratory of Advanced High-Temperature Materials and Precision Forming, School of Materials Science and Engineering, Shanghai Jiao Tong University, Shanghai, 200240, China

\*Corresponding author.

sliu@ncst.edu.cn

*Preparation of solid electrolytes:* The solid electrolyte  $\text{Li}_{1.3}\text{Al}_{0.3}\text{Ti}_{1.7}(\text{PO}_4)_3$  was synthesized by the high-temperature solid-state phase method.  $\text{Li}_2\text{CO}_3$ (99.8%),  $\text{TiO}_2$ (99.9%) and  $\text{Al}_2\text{O}_3$ (99.5%) were selected as the starting powder and dried in the oven for 24h to remove the moisture in the raw materials. The drying raw materials and  $\text{NH}_4\text{H}_2\text{PO}_4$ (99%) were weighed according to the stoichiometric ratio, and then performed the first ball milling. After drying, the mixture was ground and calcined at 850 °C for 6h, followed by a second ball mill and high-temperature calcination. The obtained solid electrolyte powder was pressed into an electrolyte pellet with a diameter of 12mm on a single axis of 10 mPa. The electrolytes were sintered for 4h at 800 °C in air and sintered in an alumina crucible. Prior to other measurements and tests, the electrolyte pellets were dry-polished with sandpaper to make their surfaces smooth and contamination-free. Finally,  $\text{Li}_{1.3}\text{Al}_{0.3}\text{Ti}_{1.7}(\text{PO}_4)_3$  electrolyte pellets with a diameter of 11mm and a thickness of 1mm were obtained.

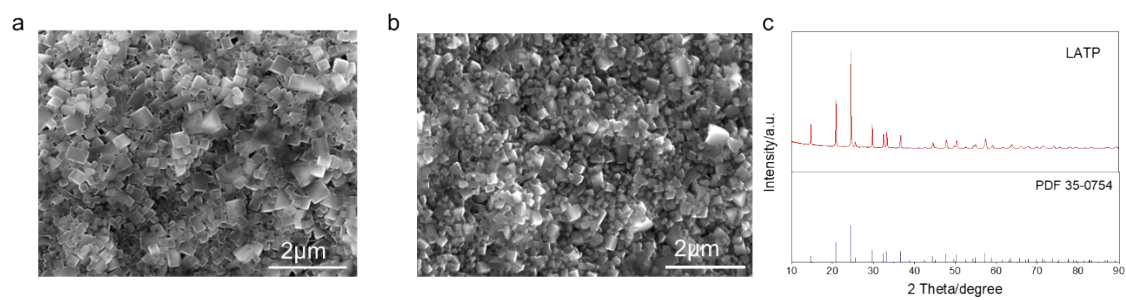

**Fig. S1.** Surface and cross-sectional SEM images of  $\text{Li}_{1.3}\text{Al}_{0.3}\text{Ti}_{1.7}(\text{PO}_4)_3$  pellet. (a, b) and XRD pattern of as-prepared LATP and standard  $\text{Li}_{1.3}\text{Al}_{0.3}\text{Ti}_{1.7}(\text{PO}_4)_3$  (c).

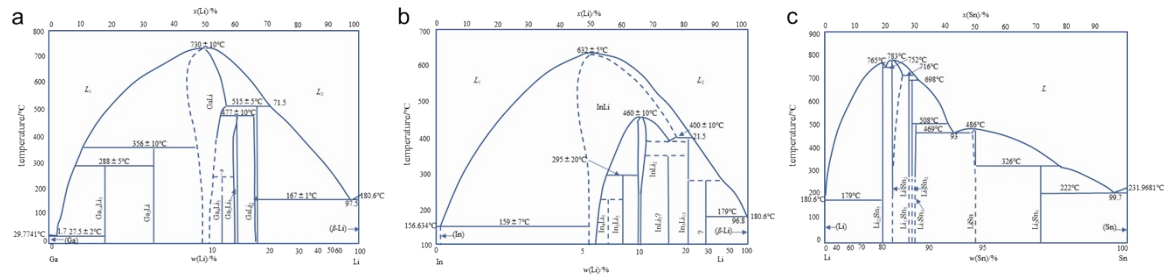

**Fig. S2.** Phase diagram of the Li-Ga, Li-In and Li-Sn alloy.

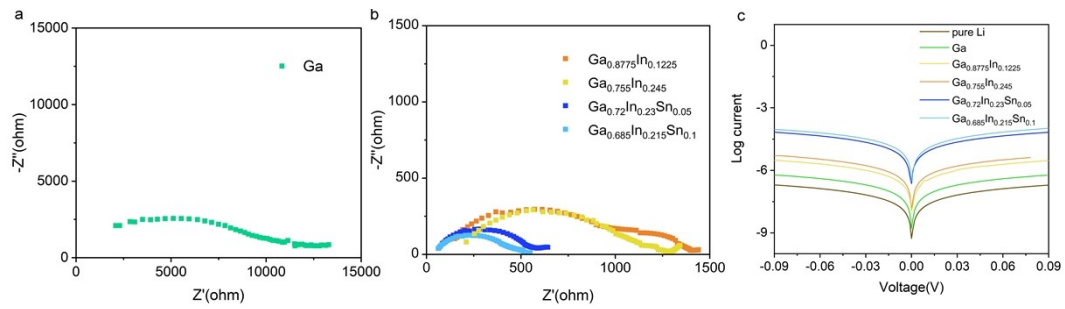

**Fig. S3.** EIS and Tafel plot of the cell with different elemental contents of the low-melting alloy.

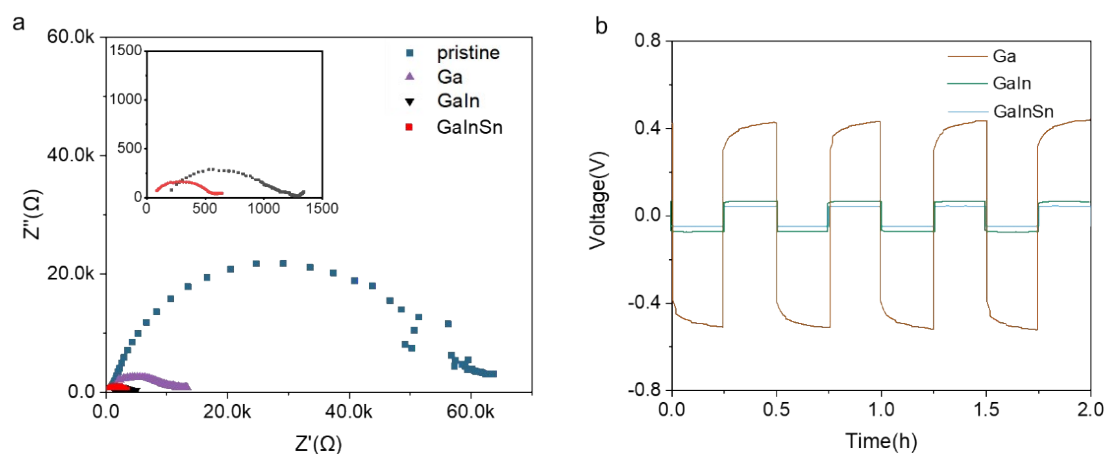

**Fig. S4.** Interfacial resistance of different liquid metal interlayer (a), the corresponding circular graph at  $0.05 \text{ mA cm}^{-2}$  (b).

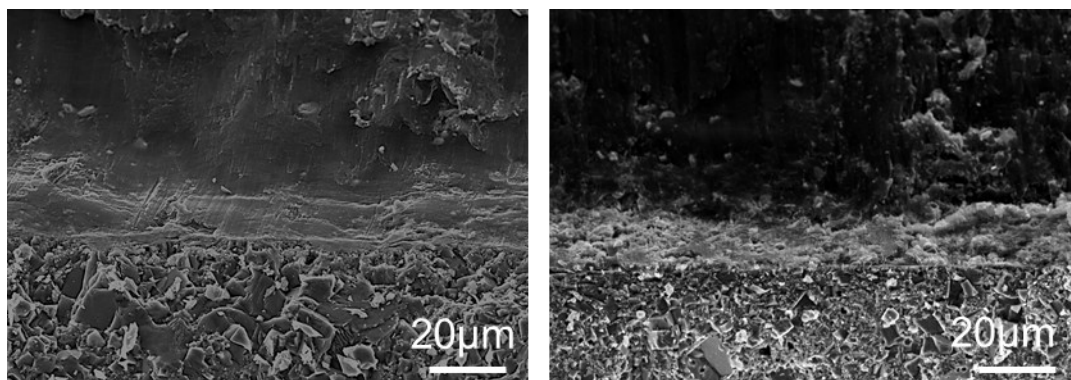

**Fig. S5.** Cross-section SEM images of before cycling (left) and after cycling (right).

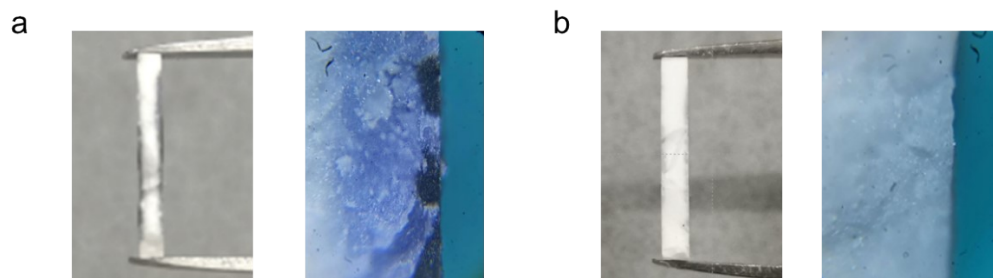

**Fig. S6.** Cross-sectional optical microscope image of the LATP with pure Li (a), with LMA@Li (b).

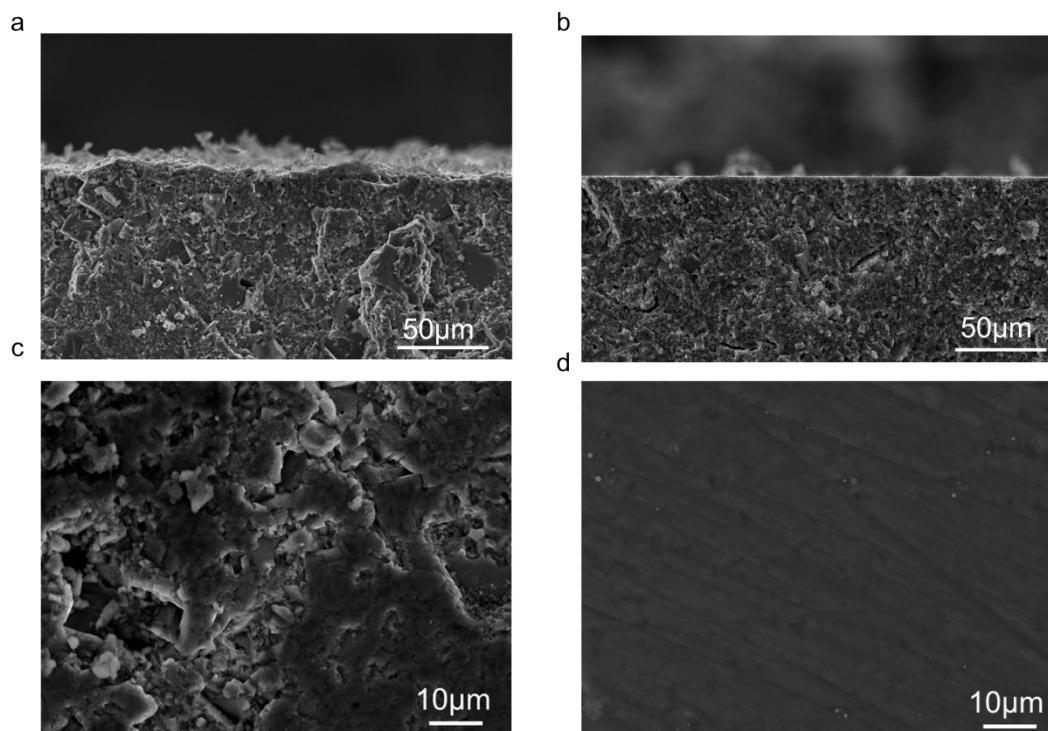

**Fig. S7.** Cross-sectional SEM image of the cycled LATP with pure Li (a), with LMA@Li (b). Top view SEM image of the LATP with pure Li (c), with LMA@Li (d)

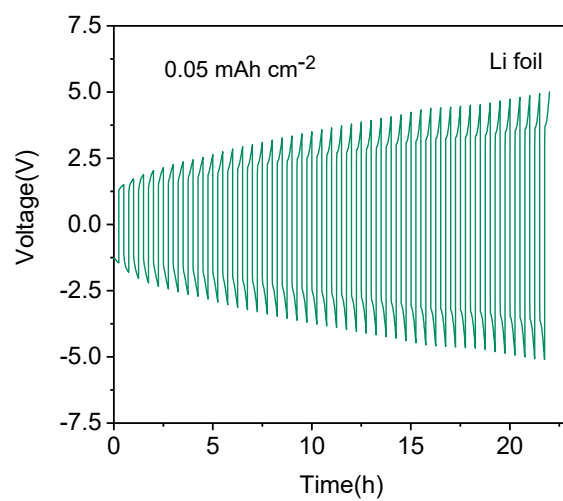

**Fig. S8.** The Galvanostatic cycling of symmetric cells with pure Li at 0.05 mA cm<sup>-2</sup>.

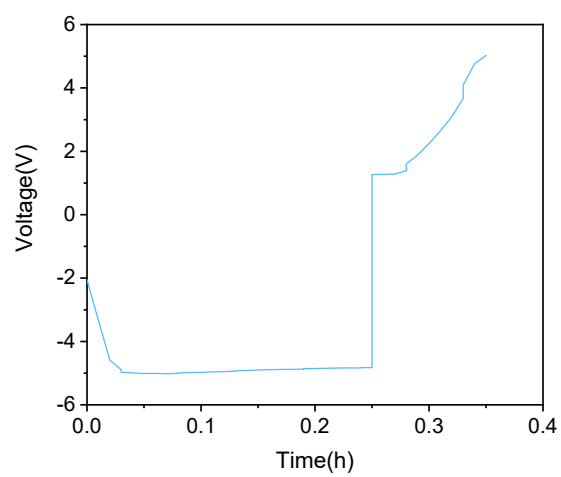

**Fig. S9.** The Galvanostatic cycling of symmetric cells with pure Li at  $0.2 \text{ mA cm}^{-2}$ .

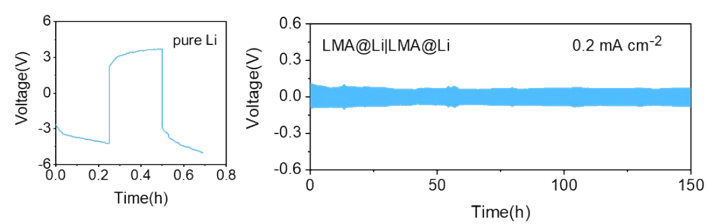

**Fig. S10.** The voltage profile of pure Li and LMA@Li at 60 °C with  $0.2 \text{ mA cm}^{-2}$ .

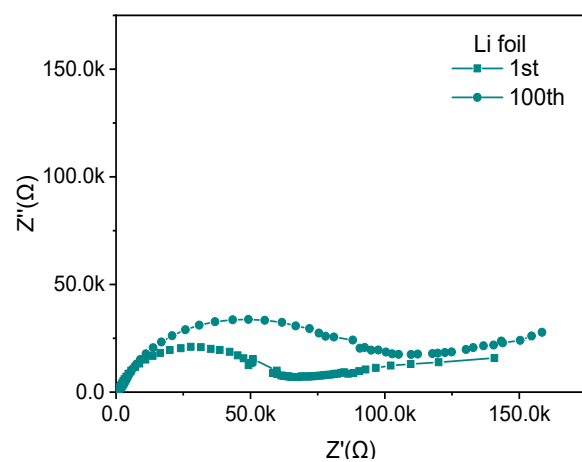

**Fig S11.** EIS of the symmetric cell with pure Li before cycling and after 100 cycles.

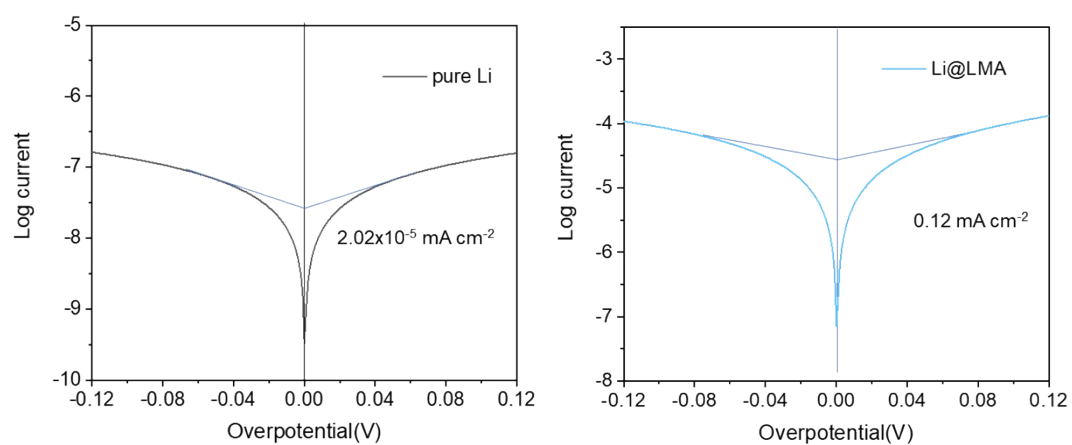

**Fig. S12.** Tafel plot of LATP with pure Li and LMA@Li.

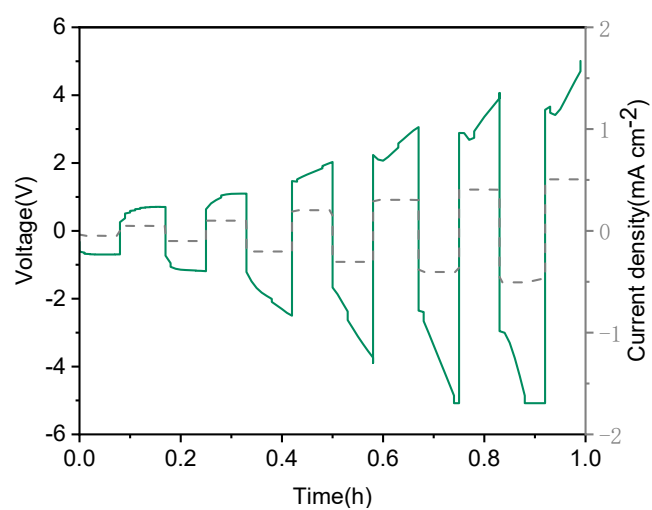

**Fig. S13.** Rate performance of symmetric cells with pure Li at different current densities from 0.05 to 0.5 mA cm<sup>-2</sup>

| Sample                                                                                | Crystal structure | a (Å) | b (Å) | c (Å)  |
|---------------------------------------------------------------------------------------|-------------------|-------|-------|--------|
| LiTi <sub>2</sub> (PO <sub>4</sub> ) <sub>3</sub>                                     | R-3c              | 8.513 | 8.513 | 20.878 |
| Li <sub>1.3</sub> Al <sub>0.3</sub> Ti <sub>1.7</sub> (PO <sub>4</sub> ) <sub>3</sub> | R-3c              | 8.500 | 8.500 | 20.808 |
| Agreement factors: R <sub>p</sub> =9.1, R <sub>wp</sub> =12.8                         |                   |       |       |        |

**Table S1:** Results of the refinements of the structural parameters for LATP.

|                                    | Binding energy (eV) | FWHM (eV) | Area (%) |
|------------------------------------|---------------------|-----------|----------|
| Ti <sup>4+</sup> 2p <sub>3/2</sub> | 459.9               | 1.098     | 36.57    |
| Ti <sup>3+</sup> 2p <sub>3/2</sub> | 458.5               | 1.87      | 36.48    |
| Ti <sup>4+</sup> 2p <sub>1/2</sub> | 465.8               | 1.37      | 10.76    |
| Ti <sup>3+</sup> 2p <sub>1/2</sub> | 464.4               | 2.06      | 17.18    |

**Table S2:** Parameters used to curve fit Ti 2p from LATP with pure Li.

|                                    | Binding energy (eV) | FWHM (eV) | Area (%) |
|------------------------------------|---------------------|-----------|----------|
| Ti <sup>4+</sup> 2p <sub>3/2</sub> | 459.6               | 1.53      | 66.17    |
| Ti <sup>4+</sup> 2p <sub>1/2</sub> | 465.3               | 2.24      | 33.8     |

**Table S3:** Parameters used to curve fit Ti 2p from LATP with LMA@Li.

Table S4. Comparison of cell cycle time of solid lithium metal batteries based on solid-state electrolytes.

| Type                                                                 | Current<br>density<br>(mA cm <sup>-2</sup> ) | Overpotential<br>(mV) | Cycle<br>time (h) | Ref.           |
|----------------------------------------------------------------------|----------------------------------------------|-----------------------|-------------------|----------------|
| Si/LLZO/Si                                                           | 0.1                                          | 100                   | 12                | [1]            |
| Al <sub>2</sub> O <sub>3</sub> /LATP/ Al <sub>2</sub> O <sub>3</sub> | 0.01                                         | 900                   | 600               | [2]            |
| LATP-PEO                                                             | 0.1                                          | 200                   | 200               | [3]            |
| Al <sub>2</sub> O <sub>3</sub> -doped ZnO-LATP                       | 0.1                                          | 400                   | 800               | [4]            |
| IL@SPF-LATP                                                          | 0.05                                         | 200                   | 850               | [5]            |
| Al/LLZO/Al                                                           | 0.1                                          | 25                    | 34                | [6]            |
| LMA@Li/LATP/LMA@L                                                    | 0.05                                         | 50                    | 1200              | This<br>i work |

- [1]. W. Luo, Y. Gong, Y. Zhu, K. K. Fu, J. Dai, S. D. Lacey, C. Wang, B. Liu, X. Han, Y. Mo, E. D. Wachsman and L. Hu, Transition from Superlithiophobicity to Superlithiophilicity of Garnet Solid-State Electrolyte. *J. Am. Chem. Soc.*, 2016, 138, 12258-12262.
- [2]. Y. Liu, Q. Sun, Y. Zhao, B. Wang, P. Kaghazchi, K. R. Adair, R. Li, C. Zhang, J. Liu, L.-Y. Kuo, Y. Hu, T.-K. Sham, L. Zhang, R. Yang, S. Lu, X. Song and X. Sun, Stabilizing the Interface of NASICON Solid Electrolyte against Li Metal with Atomic Layer Deposition. *ACS Appl. Mater. Interfaces.*, 2018, **10**, 31240-31248.
- [3]. Z. Yang, H. Yuan, C. Zhou, Y. Wu, W. Tang, S. Sang and H. Liu, Facile interfacial adhesion enabled LATP-based solid-state lithium metal battery. *Chem. Eng. J.*, 2020, 392, 123650

- [4]. H. Bai, J. Hu, Y. Duan, T. Kozawa, M. Naito, J. Zhang and S. Dong, Surface modification of  $\text{Li}_{1.3}\text{Al}_{0.3}\text{Ti}_{1.7}(\text{PO}_4)_3$  ceramic electrolyte by  $\text{Al}_2\text{O}_3$ -doped ZnO coating to enable dendrites-free all-solid-state lithium-metal batteries. *Ceram. Int.*, 2019, **45**, 14663-14668.
- [5]. M. Lei, S. Fan, Y. Yu, J. Hu, K. Chen, Y. Gu, C. Wu, Y. Zhang and C. Li, NASICON-based solid state Li-Fe-F conversion batteries enabled by multi-interface-compatible sericin protein buffer layer. *Energy Storage Mater.*, 2022, **47**, 551-560.
- [6]. K. Fu, Y. Gong, B. Liu, Y. Zhu, S. Xu, Y. Yao, W. Luo, C. Wang, S. D. Lacey and J. J. S. A. Dai, Toward garnet electrolyte-based Li metal batteries: An ultrathin, highly effective, artificial solid-state electrolyte/metallic Li interface. *Sci. Adv.*, 2017, **3**, e1601659.
